# Supplementary material
Source: PubMed Central journal article supplement (PMC6125179)
Supplement: NIHMS970378-supplement-1.pdf [file NIHMS970378-supplement-1.pdf]

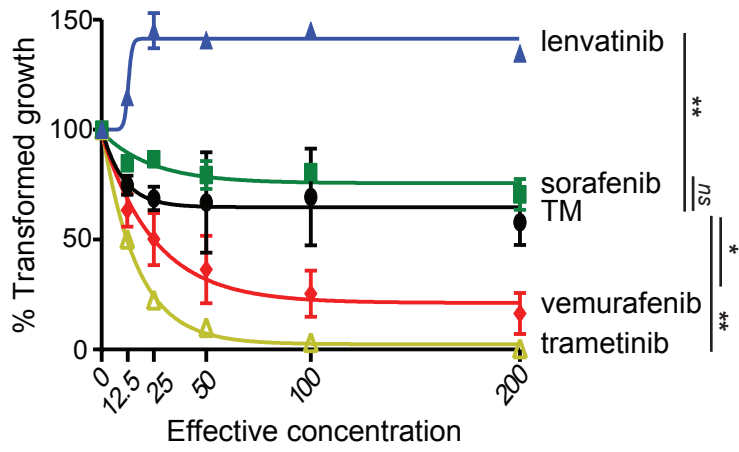

**Supplementary Figure 1. TM reduces anchorage-independent growth of K1 cells.**

% transformed growth in soft agar (mean  $\pm$  SEM, triplicate samples, three experiments) normalized to vehicle control of K1 cells treated with increasing doses (effective concentration) of lenvatinib (▲), sorafenib (■), TM (●), vemurafenib (◆), or trametinib (▲). \*  $p < 0.05$ . \*\*  $p < 0.01$ , ns = not significant.
