# Supplementary material
Source: PubMed Central journal article supplement (PMC6125179)
Supplement: NIHMS970378-supplement-2.pdf [file NIHMS970378-supplement-2.pdf]

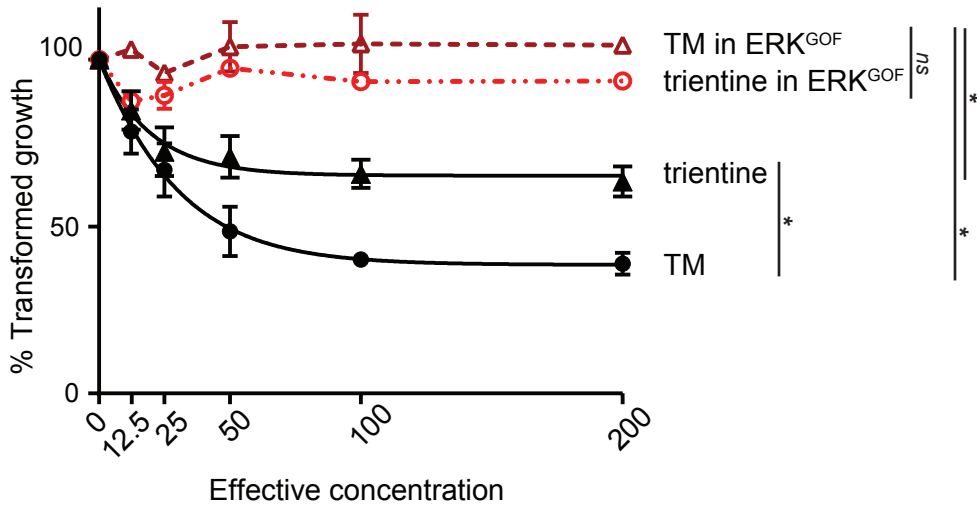

**Supplementary Figure 2. Trientine reduces anchorage-independent growth of BCPAP cells.**

% transformed growth in soft agar (mean ± SEM, triplicate samples, three experiments) normalized to vehicle control of BCPAP cells treated with trientine (▲) in comparison to cells treated with TM (●) and BCPAP cells stably transduced with ERK<sup>GOF</sup> treated with trientine (○) in comparison to cells treated with TM (△).

\*  $p < 0.05$ , *ns* = not significant.
