# Supplementary material
Source: PubMed Central journal article supplement (PMC6125179)
Supplement: NIHMS970378-supplement-3.pdf [file NIHMS970378-supplement-3.pdf]

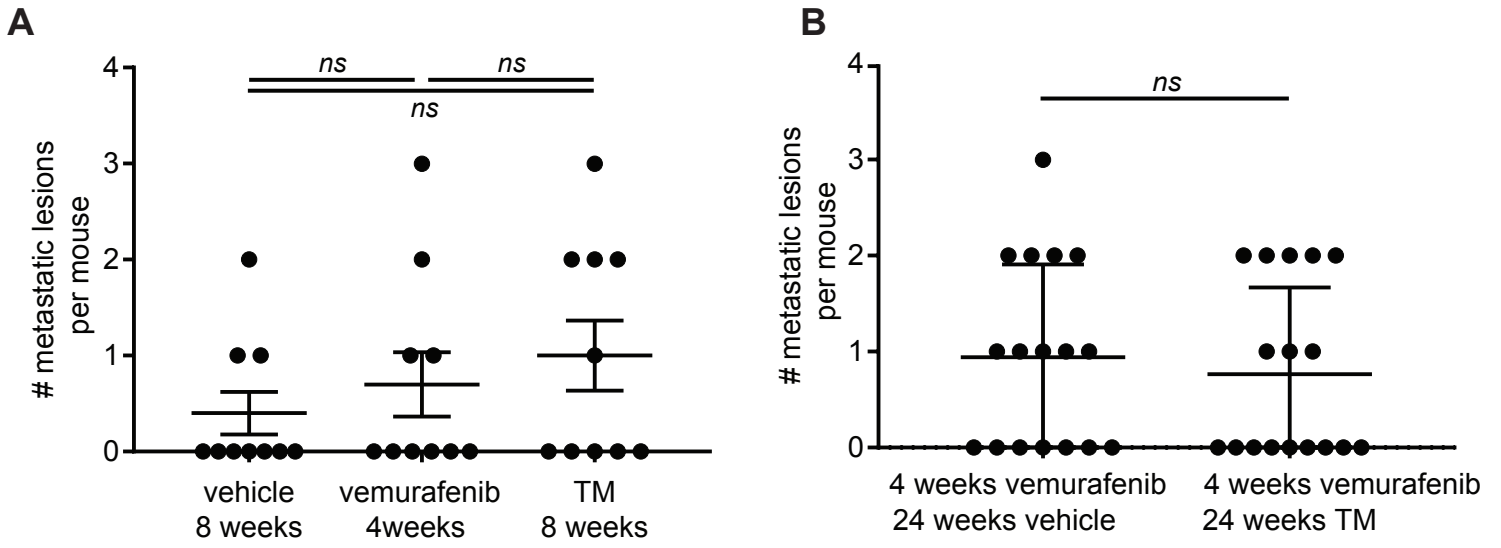

**Supplementary Figure 3. Number of lung metastases in TBP mice after A) 8 weeks or B) 24 weeks of the indicated drug treatments. All metastases were between 0.5-2.0 mm in diameter. *ns* = not significant.**
