# Supplementary material
Source: PubMed Central journal article supplement (PMC6125179)
Supplement: NIHMS970378-supplement-4.pdf [file NIHMS970378-supplement-4.pdf]

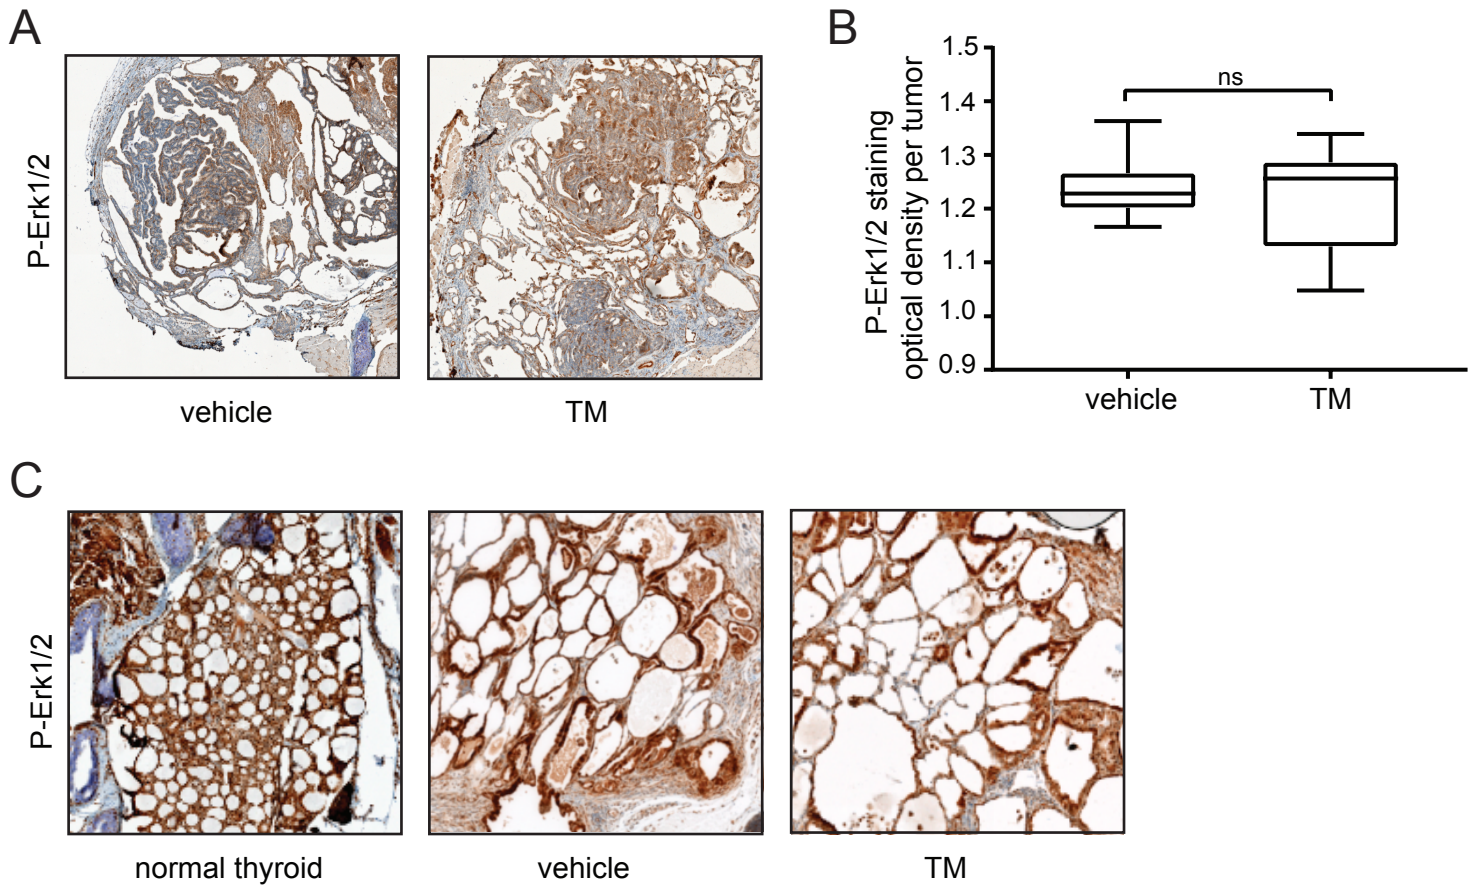

**Supplementary Figure 4. Optical density quantification of P-Erk1/2 staining in TBP mice with and without TM treatment.**

**A)** Representative image of Hematoxylin stained (purple) and immunohistochemically anti-P-Erk1/2 antibody stained (brown) thyroid section isolated from a TBP mouse euthanized at the 8-week fixed endpoint after being treated with vehicle (*left*) or TM (*right*).

**B)** Boxplot of P-Erk1/2 staining optical density per tumor (17 tumors from 8 mice in each cohort) at the 8-week fixed endpoint in TBP mice treated with either vehicle or TM.

**C)** Representative image of Hematoxylin stained (purple) and immunohistochemically anti-P-Erk1/2 antibody stained (brown) thyroid section isolated from a normal thyroid (*left*), and the non-tumor thyroid portions of a TBP mouse euthanized at the 8-week fixed endpoint after being treated with vehicle (*middle*) or TM (*right*).

*ns*= not significant.
