# Supplementary material
Source: PubMed Central journal article supplement (PMC6125179)
Supplement: NIHMS970378-supplement-5.pdf [file NIHMS970378-supplement-5.pdf]

**A**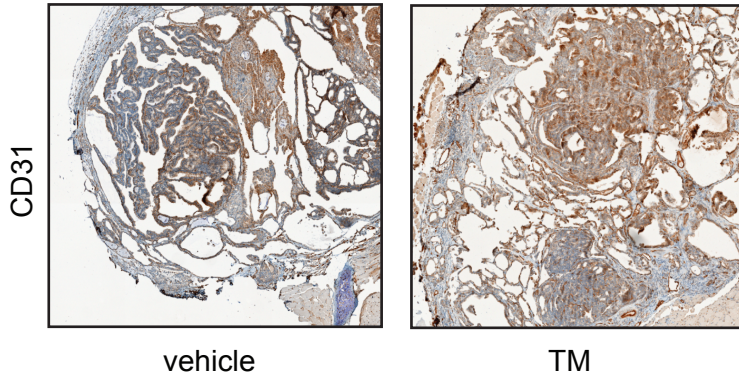**B**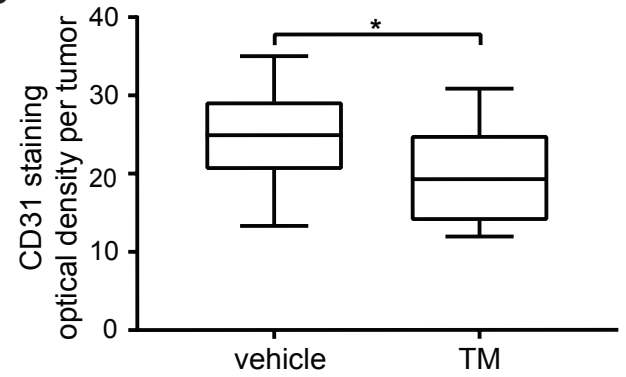

**Supplementary Figure 5. Quantification of CD31 staining in TBP mice with and without TM treatment.**

**A)** Representative image of a thyroid section Hematoxylin stained (purple) and immunohistochemically stained with an anti-CD31 antibody (brown) isolated from a TBP mouse euthanized at the 8-week fixed endpoint after being treated with vehicle (*left*) or TM (*right*).

**B)** Boxplot of CD31 staining optical density per tumor (17 tumors from 8 mice in each cohort) at the 8-week fixed endpoint in TBP mice treated with either vehicle or TM.

\* $p < 0.05$ .
