# Supplementary material
Source: PubMed Central journal article supplement (PMC6125179)
Supplement: NIHMS970378-supplement-6.pdf [file NIHMS970378-supplement-6.pdf]

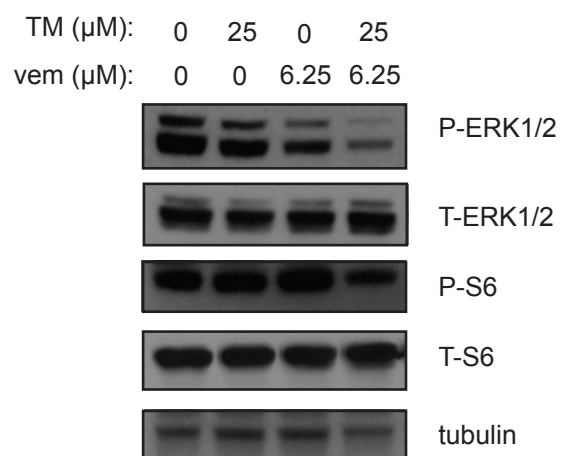

**Supplementary Figure 6. Reduction in MAPK signaling of BCPAP cells treated with vemurafenib and TM.** Immunoblot detection of phosphorylated (P-) and total (T-) Erk1/2 protein, downstream effector protein S6, and tubulin in BCPAP cells treated with the indicated concentrations of TM and vemurafenib (vem).
