# Supplementary material
Source: PubMed Central journal article supplement (PMC6125179)
Supplement: NIHMS970378-supplement-8.pdf [file NIHMS970378-supplement-8.pdf]

|                          | Mouse          | Week of treatment<br>(days per week treated) |            |            |            |            |            |            |            | Total days<br>treated |
|--------------------------|----------------|----------------------------------------------|------------|------------|------------|------------|------------|------------|------------|-----------------------|
|                          |                | 1                                            | 2          | 3          | 4          | 5          | 6          | 7          | 8          |                       |
| vehicle<br>treatment     | 1              | 7                                            | 7          | 7          | 5          | 5          | 5          | 7          | 7          | 50                    |
|                          | 2              | 7                                            | 7          | 7          | 5          | 5          | 5          | 7          | 7          | 50                    |
|                          | 3              | 7                                            | 7          | 7          | 5          | 5          | 5          | 7          | 7          | 50                    |
|                          | 4              | 7                                            | 7          | 7          | 5          | 5          | 5          | 7          | 7          | 50                    |
|                          | 5              | 7                                            | 5          | 7          | 7          | 7          | 6          | 7          | 7          | 53                    |
|                          | 6              | 7                                            | 5          | 7          | 7          | 7          | 5          | 7          | 7          | 52                    |
|                          | 7              | 7                                            | 7          | 5          | 7          | 7          | 5          | 7          | 7          | 52                    |
|                          | 8              | 7                                            | 7          | 5          | 7          | 7          | 5          | 7          | 7          | 52                    |
|                          | 9              | 7                                            | 6          | 7          | 5          | 7          | 5          | 7          | 7          | 51                    |
|                          | 10             | 7                                            | 7          | 5          | 7          | 7          | 5          | 7          | 5          | 50                    |
|                          | <b>Average</b> | <b>7.0</b>                                   | <b>6.5</b> | <b>6.4</b> | <b>6.0</b> | <b>6.2</b> | <b>5.1</b> | <b>7.0</b> | <b>6.8</b> | <b>51.0</b>           |
|                          |                |                                              |            |            |            |            |            |            |            |                       |
| Vemurafenib<br>treatment | 1              | 7                                            | 7          | 7          | 5          | 5          | 5          | 5          | 7          | 48                    |
|                          | 2              | 7                                            | 6          | 7          | 5          | 5          | 5          | 7          | 7          | 49                    |
|                          | 3              | 7                                            | 5          | 5          | 5          | 5          | 7          | 6          | 7          | 47                    |
|                          | 4              | 7                                            | 5          | 5          | 5          | 5          | 7          | 7          | 7          | 48                    |
|                          | 5              | 5                                            | 5          | 5          | 5          | 6          | 6          | 5          | 7          | 44                    |
|                          | 6              | 7                                            | 5          | 7          | 7          | 7          | 7          | 6          | 7          | 53                    |
|                          | 7              | 7                                            | 5          | 7          | 7          | 7          | 7          | 7          | 7          | 54                    |
|                          | 8              | 7                                            | 5          | 7          | 7          | 7          | 7          | 7          | 7          | 54                    |
|                          | 9              | 7                                            | 7          | 5          | 7          | 7          | 5          | 7          | 7          | 52                    |
|                          | 10             | 7                                            | 6          | 7          | 6          | 5          | 7          | 6          | 7          | 51                    |
|                          | <b>Average</b> | <b>6.8</b>                                   | <b>5.6</b> | <b>6.2</b> | <b>5.9</b> | <b>5.9</b> | <b>6.3</b> | <b>6.3</b> | <b>7.0</b> | <b>50.0</b>           |
|                          |                |                                              |            |            |            |            |            |            |            |                       |
| TM<br>treatment          | 1              | 7                                            | 7          | 5          | 5          | 4          | 5          | 7          | 7          | 47                    |
|                          | 2              | 7                                            | 6          | 7          | 4          | 5          | 5          | 7          | 6          | 47                    |
|                          | 3              | 5                                            | 5          | 5          | 6          | 7          | 6          | 5          | 7          | 46                    |
|                          | 4              | 7                                            | 7          | 5          | 7          | 6          | 7          | 7          | 6          | 52                    |
|                          | 5              | 7                                            | 7          | 5          | 6          | 5          | 6          | 7          | 6          | 49                    |
|                          | 6              | 7                                            | 5          | 7          | 7          | 5          | 6          | 7          | 7          | 51                    |
|                          | 7              | 7                                            | 7          | 6          | 5          | 7          | 7          | 6          | 7          | 52                    |
|                          | 8              | 7                                            | 6          | 5          | 7          | 6          | 7          | 6          | 7          | 51                    |
|                          | 9              | 5                                            | 7          | 6          | 7          | 6          | 7          | 7          | 6          | 51                    |
|                          | 10             | 7                                            | 5          | 7          | 5          | 6          | 7          | 7          | 6          | 50                    |
|                          | <b>Average</b> | <b>6.6</b>                                   | <b>6.2</b> | <b>5.8</b> | <b>5.9</b> | <b>5.7</b> | <b>6.3</b> | <b>6.6</b> | <b>6.5</b> | <b>49.6</b>           |

Supplementary Table 2. Days per week (up to 7) mice (1-10) were treated with vehicle, vemurafenib, or TM in the 8-week study.
